# Supplementary material for: SPOP promotes ubiquitination and degradation of LATS1 to enhance kidney cancer progression
Source: PubMed Central journal article supplement — eBioMedicine. 2020 May 3;56:102795. doi: 10.1016/j.ebiom.2020.102795 (PMC7248661; doi:10.1016/j.ebiom.2020.102795), 2020-05-03
Supplement: mmc1.pdf [file mmc1.pdf]

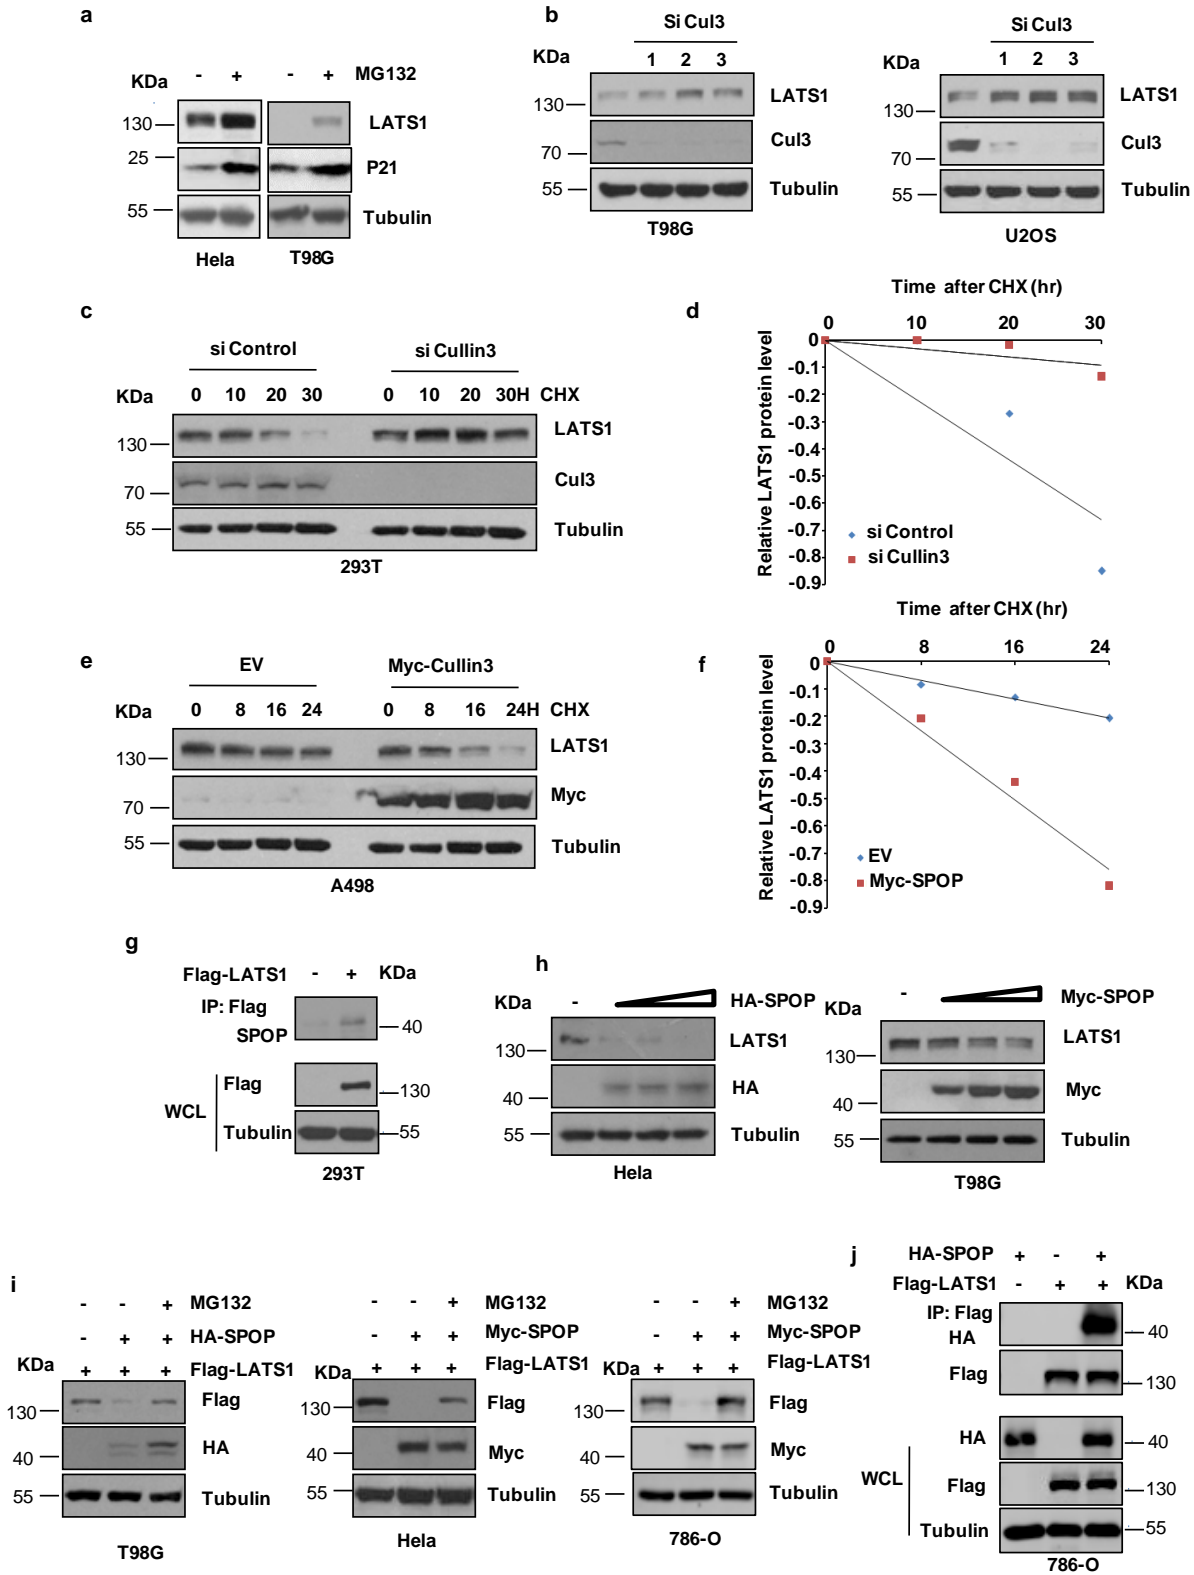

Fig. S1. Cullin3<sup>SPOP</sup> is the Physiological E3 Ubiquitin Ligase for LATS1.

- (a) IB analysis of WCLs derived from HeLa cells and T98G cells treated with 10 $\mu$ M MG132 for 10 hr.
- (b) IB analysis of WCLs derived from T98G and U2OS cells transfected with Cullin3 siRNA.
- (c) B analysis of WCLs derived from 293T cells after the specified duration of 100 $\mu$ g/ml cycloheximide (CHX) transfected with Cullin3 siRNA.
- (d) The abundance of LATS1 protein in (c) was quantified and plotted.
- (e) IB analysis of WCLs derived from A498 cells after the specified duration of 100 $\mu$ g/ml cycloheximide (CHX) transfected with Cullin3 plasmids.
- (f) The abundance of LATS1 protein in (E) was quantified and plotted.
- (g) IB analysis of WCLs and immunoprecipitates (IPs) derived from 293T cells transfected with indicated constructs. Cells were treated with MG132 (10 $\mu$ M) before harvesting.
- (h) IB analysis of WCLs derived from HeLa or T98G cells transfected with increasing doses of plasmid encoding SPOP.
- (i) IB analysis of WCLs derived from T98G cells or HeLa cells transfected with indicated constructs. Where indicated, cells were treated with 10 $\mu$ M MG132 before harvesting.
- (j) IB analysis of WCLs and immunoprecipitates (IPs) derived from 786-O cells transfected with indicated constructs. Cells were treated with MG132 (10 $\mu$ M) before harvesting.

**a**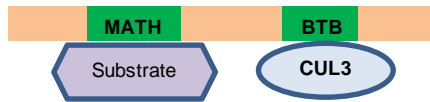**b**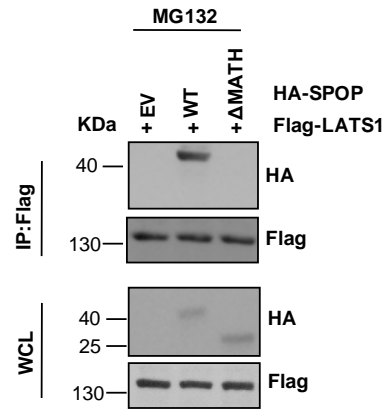**c**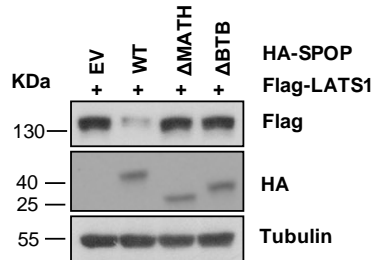**d**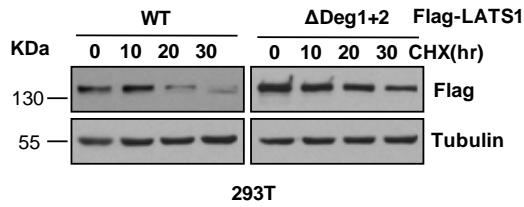**e**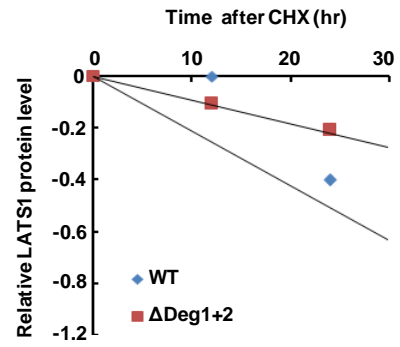**f**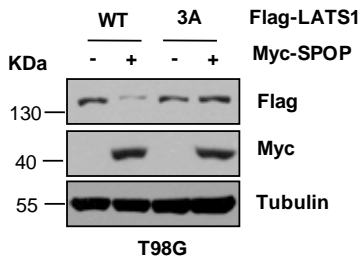**g**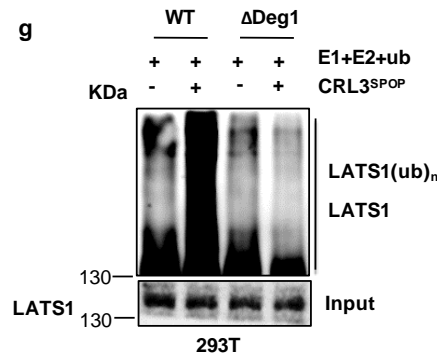**h**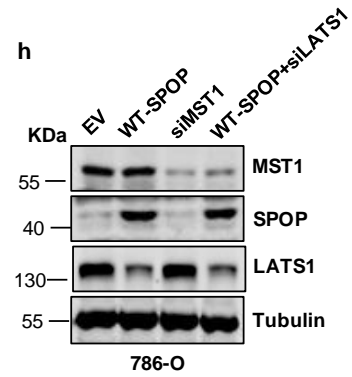

Fig. S2. SPOP Ubiquitinated and Degraded of LATS1 Depending on the Degron Motif.

- (a) Schematic of SPOP domains.
- (b) IB analysis of WCLs and immunoprecipitates (IPs) derived from 293T cells transfected with indicated plasmids.
- (c) IB analysis of WCLs derived from 293T cells transfected with indicated plasmids.
- (d) IB analysis of WCLs derived from 293T cells after the specified duration of 100 $\mu$ g/ml cycloheximide (CHX) transfected with indicated Flag-tagged LATS1 plasmids.
- (e) The abundance of LATS1 protein in (D) was quantified and plotted.
- (f) IB analysis of WCLs derived from 293T cells transfected with indicated plasmids.
- (g) In vitro ubiquitination assay was performed to detect LATS1 ubiquitination by SPOP.
- (h) IB analysis of WCLs derived from 786-O cells transfected with indicated plasmids.

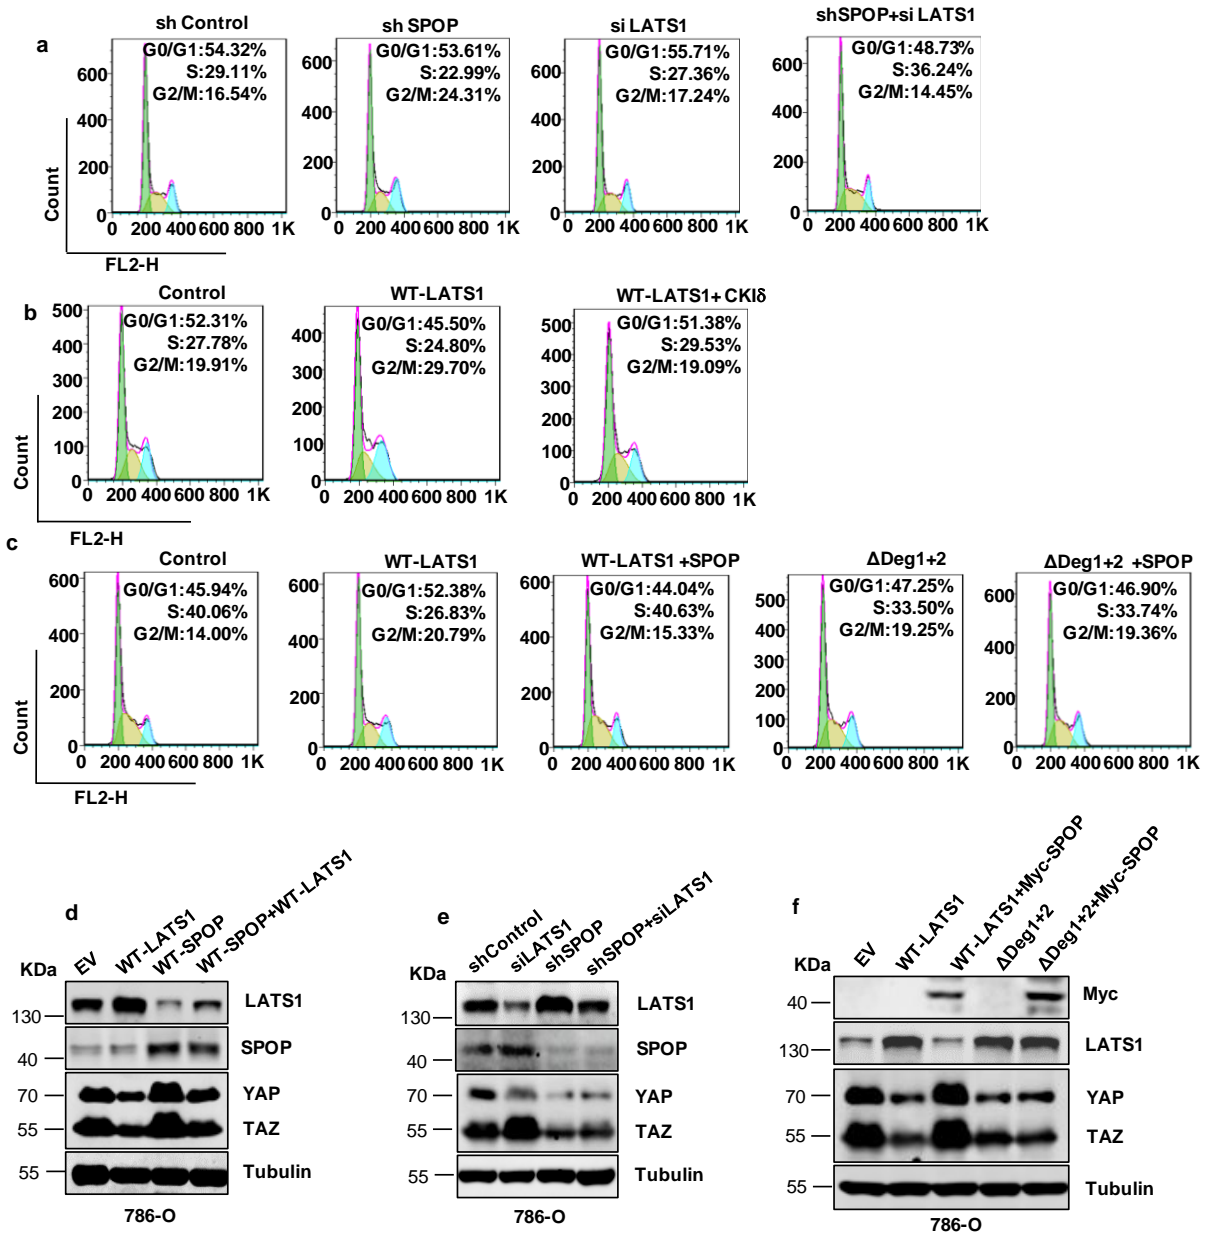

Fig. S3. SPOP Regulates the Cell Cycle Distribution of Kidney Cancer Cells.

- (a) The cell cycle distribution of 786-O cells treated with downregulation of SPOP or LATS1.
- (b) The cell cycle distribution of 786-O cells transfected with indicated plasmids.
- (c) The cell cycle distribution of 786-O cells transfected with indicated plasmids.
- (d-f) IB analysis of WCLs derived from 786-O cells transfected with indicated plasmids.

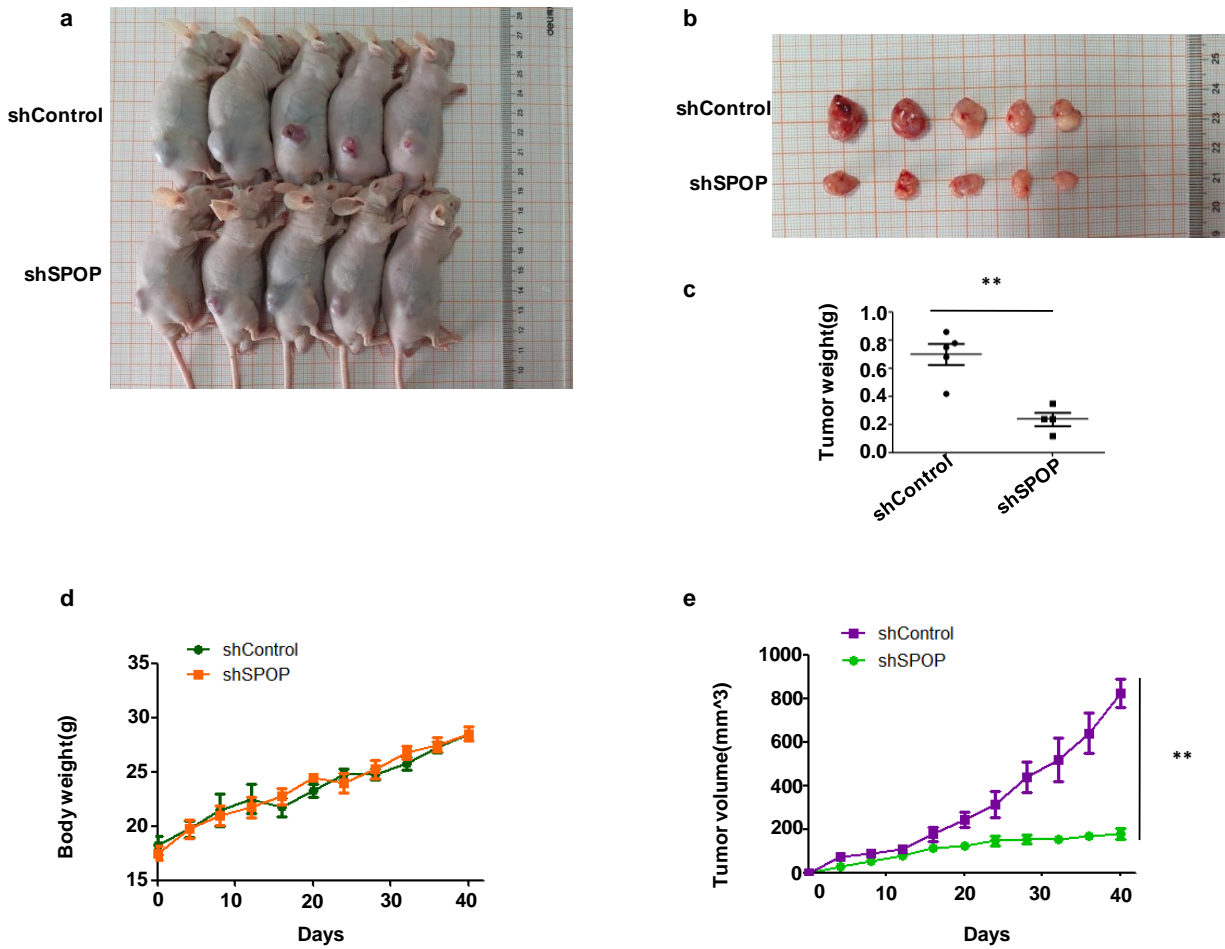

Fig. S4. SPOP Promotes Tumorigenesis.

- (a) 786-O-shControl, 786-O-shSPOP polyclonal stable cell lines were injected subcutaneously into the BALB/c-nu/nu mice. 40 days later, mice were anesthetized and taken a picture.
- (b) The tumors were dissected and taken a picture.
- (c) The weights of the dissected tumors in B.
- (d) *In vivo* tumor growth was measured over the indicated time period.
- (e) The body weights of the BALB/c-nu/nu mice are measured over the indicated time period.
